# Supplementary material
Source: PubMed Central journal article supplement (PMC6811440)
Supplement: AAC.01319-19-s0001.pdf [file AAC.01319-19-s0001.pdf]

## **Revisiting the $\beta$ -lactams for Tuberculosis Therapy: A Compound-Compound Synthetic Lethality Approach**

Shiqi Xiao<sup>a</sup>, Haidan Guo<sup>a</sup>, Warren S. Weiner<sup>b,c</sup>, Clinton Maddox<sup>d</sup>, Chunhong Mao<sup>e</sup>, Hendra Gunosewoyo<sup>f</sup>, Shaaretha Pelly<sup>a</sup>, E. Lucile White<sup>d</sup>, Lynn Rasmussen<sup>d</sup>, Frank J. Schoenen<sup>c</sup>, Jeffrey Aubé<sup>g</sup>, William R. Bishai<sup>a</sup>, and Shichun Lun<sup>a#</sup>

### **Supplemental material**

#### **Methods**

**Compound handling for verification:** All compounds were dissolved in DMSO at 4.096 mg/mL and stored at -80°C. To complete activity verification and determine minimum inhibitory concentrations (MICs), the compounds were pre-diluted eight times with 7H9 without Tween 80. 100  $\mu$ l of diluted compounds were transferred to Column 2 (an empty well) of the 96-well plate. 100  $\mu$ l of diluted compounds were transferred to Column 3 (pre-dispensed 100 $\mu$ l of assay media). 2-fold serial dilutions were carried out from Column 3 to Column 11, resulting in a 256  $\mu$ g/mL to 0.5  $\mu$ g/mL concentration range. 100  $\mu$ l of diluted bacterial cells (ca.  $10^4$  CFU) were added to Column 2 through Column 11.

**Compound handling for Structure-Activity Relationship (SAR):** All compounds were dissolved in DMSO at 2.048 mg/mL and stored at -80°C. To complete activity

verification and determine minimum inhibitory concentrations (MICs), the compounds were pre-diluted eight times with 7H9 without Tween 80. 100  $\mu$ l of diluted compounds were transferred to Column 2 (an empty well) of the 96-well plate. 100  $\mu$ l of diluted compounds were transferred to Column 3 (pre-dispensed 100 $\mu$ l of assay media). 2-fold serial dilutions were carried out from Column 3 to Column 11, resulting in a 128  $\mu$ g/mL to 0.25  $\mu$ g/mL concentration range. 100  $\mu$ l of diluted bacterial cells (ca.  $10^4$  CFU) were added to Column 2 through Column 11.

### Figure legends

**Figure S1.** Concentration response of Meropenem (upper panel) and Clavulanic acid (lower panel) on *M. tuberculosis* H37Rv.

**Figure S2.** Bioavailability assay by serum inhibition titration (SIT). Vehicle (0.5% CMC) was a negative control and 10 mg/kg of INH was a positive control. Compounds 3 (217A) and 4 (217B) were tested, in the presence of 2  $\mu$ g/mL of meropenem, at two dose levels (100 and 300 mg/kg) and three time points (15, 30, and 60 min) (A and B). Compound 6 (212E) was analyzed at 300 mg/kg and 30 min in the presence of 0, 2, 4, and 8  $\mu$ g/mL of meropenem (C-F). Bacterial growth was shown as a relative fluorescence unit.

**Figure S3.** AmiGO 1.8 gene ontology (GO) enrichment analysis. The enriched GO terms are shaded with p-values indicated. The darker the shade, the better the p-value is. The colors of the edges between the GO terms represent the relationships: “is\_a” in blue, “part\_of” in lightblue, “regulates” in black, and “positively\_regulates” in green.

## Supplementary tables

**Table S1.** Structure-Activity Relationship (SAR) for *N*-arylindole chemotype

**Table S2.** Structure-Activity Relationship (SAR) for Benzothiophene chemotype

**Table S3.** Gene expression profile upon *N*-arylindole (217A) treatment as determined by RNA-seq.

**Table S4.** Differential expression upon *N*-arylindole (217A) treatment as analyzed by RNA-seq. Linear fold change (FC) cut off was set at  $\geq 2.0$  or  $\leq -2.0$ . Significant differentially expressed genes ( $p \leq 0.05$ ) are highlighted in light brown (up-regulated:  $n=15$ ) or light green (down-regulated:  $n=34$ ).

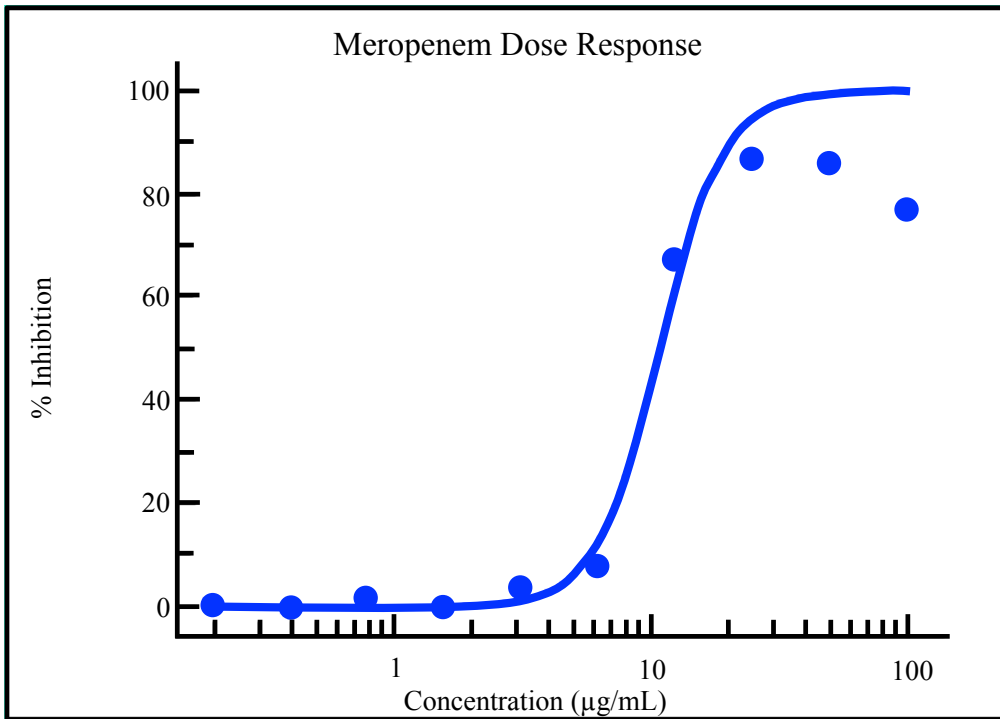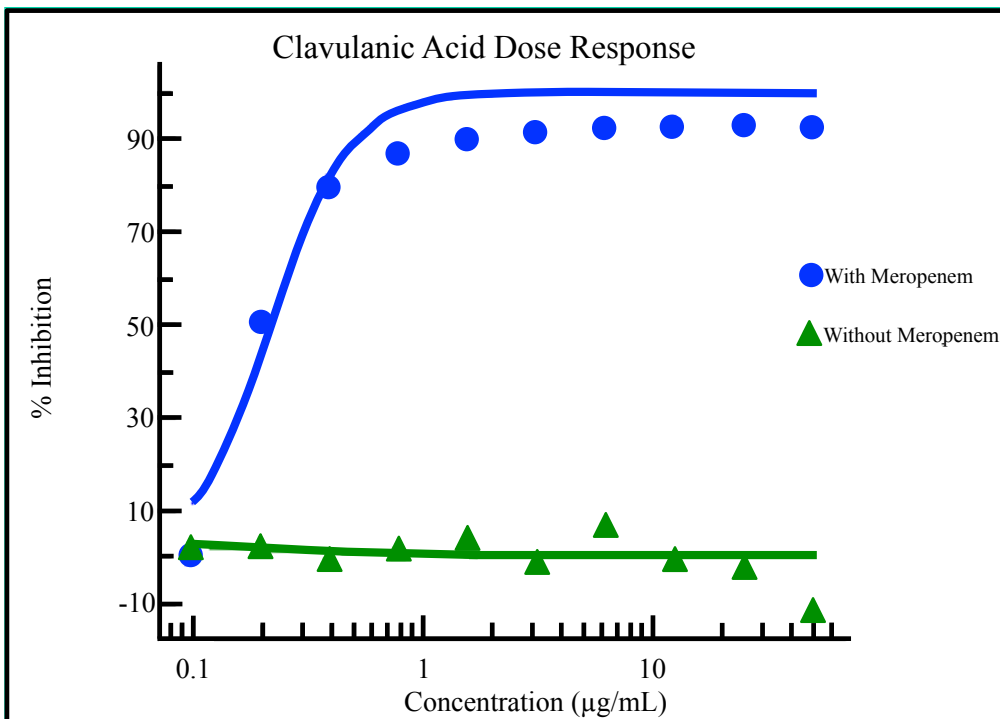

**Figure S1.** Concentration response of Meropenem (upper panel) and Clavulanic acid (lower panel) on *M. tuberculosis* H37Rv.

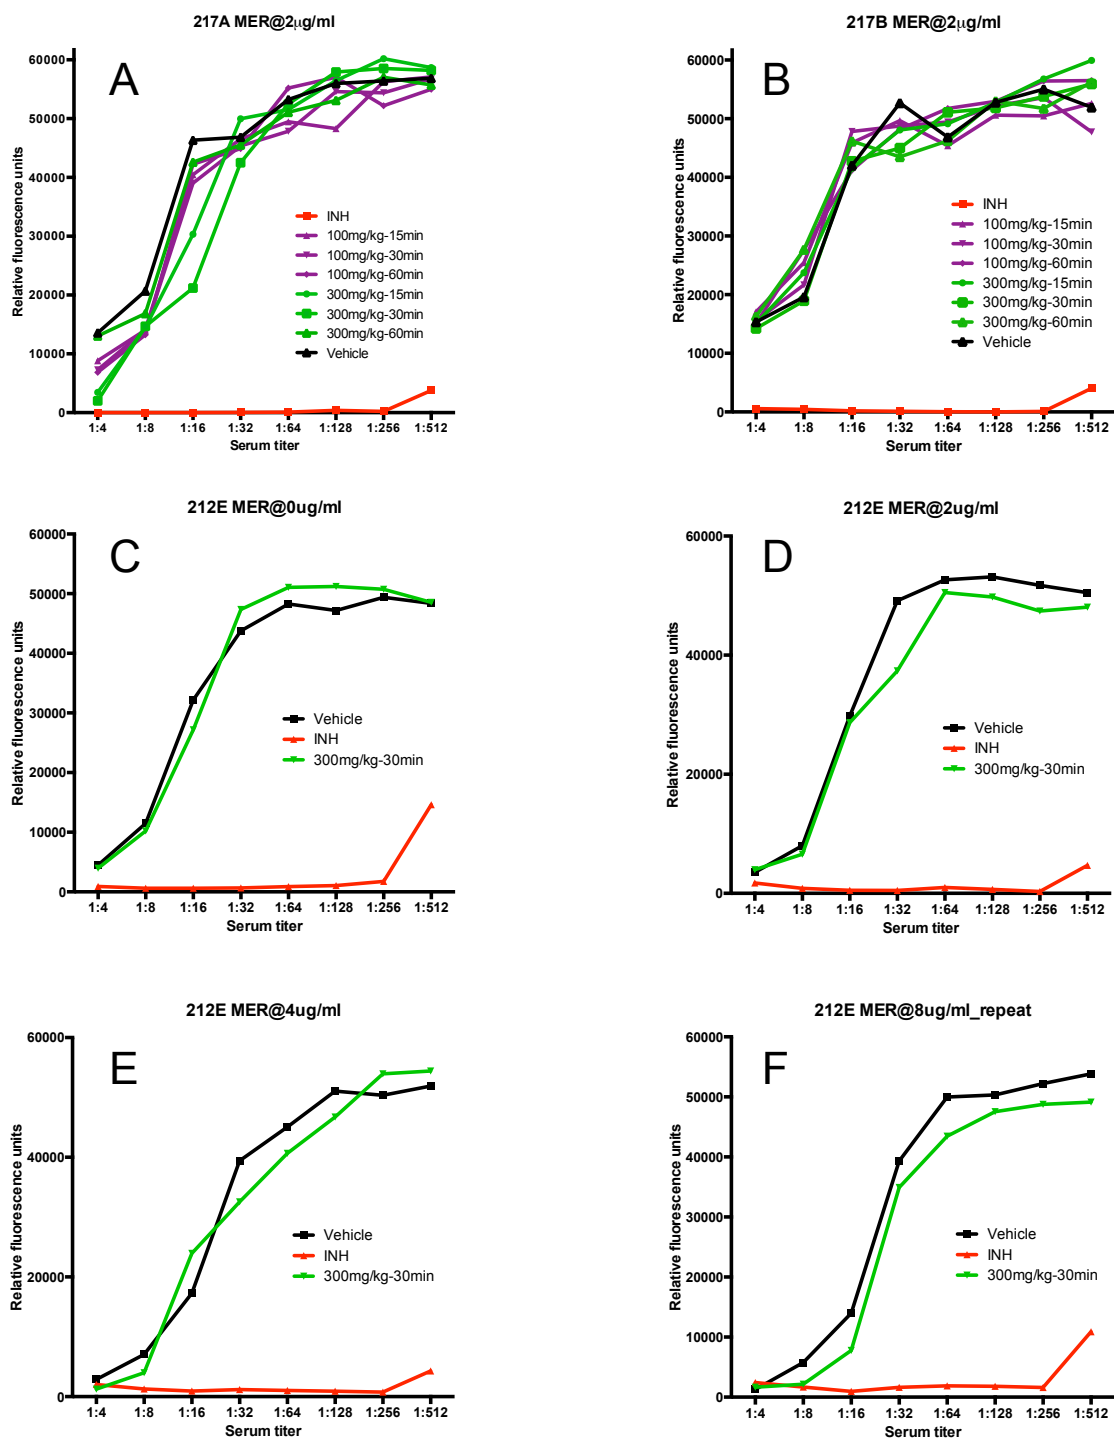

**Figure S2.** Bioavailability assay by serum inhibition titration (SIT). Vehicle (0.5% CMC) was a negative control and 10 mg/kg of INH was a positive control. Compounds 3 (217A)

and 4 (217B) were tested, in the presence of 2  $\mu\text{g/mL}$  of meropenem, at two dose levels (100 and 300 mg/kg) and three time points (15, 30, and 60 min) (A and B). Compound 6 (212E) was analyzed at 300 mg/kg and 30 min in the presence of 0, 2, 4, and 8  $\mu\text{g/mL}$  of meropenem (C-F). Bacterial growth was shown as a relative fluorescence unit.



**Figure S3.** AmiGO 1.8 gene ontology (GO) enrichment analysis. The enriched GO terms are shaded with p-values indicated. The darker the shade, the better the p-value is. The colors of the edges between the GO terms represent the relationships: “is\_a” in blue, “part\_of” in lightblue, “regulates” in black, and “positively\_regulates” in green.



**Table S1.** Synthetic lethality structure-activity relationship screen on 68 *N*-arylidole derivatives in the presence of 0 or 4  $\mu\text{g/mL}$  of meropenem (MIC:  $\mu\text{g/mL}$ )

| Entry | Structure                                                                           | PubChem CID | MIC at 0 $\mu\text{g/mL}$ of MER | MIC at 4 $\mu\text{g/mL}$ of MER |
|-------|-------------------------------------------------------------------------------------|-------------|----------------------------------|----------------------------------|
| 1     | 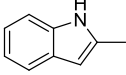   | 7224        | $\geq 128$                       | 64                               |
| 2     |    | 16054       | $\geq 128$                       | 64                               |
| 3     |    | 66518       | 64                               | 64                               |
| 4     |    | 70636       | 64                               | 32                               |
| 5     |    | 70642       | $\geq 128$                       | $\geq 128$                       |
| 6     |    | 83336       | $\geq 128$                       | 64                               |
| 7     |   | 537520      | $\geq 128$                       | $\geq 128$                       |
| 8     |  | 594174      | 16                               | 32                               |
| 9     |  | 658914      | $\geq 128$                       | $\geq 128$                       |
| 10    |  | 665108      | $\geq 256$                       | 16                               |

| Entry | Structure                                                                           | PubChem CID | MIC at 0 $\mu\text{g/mL}$ of MER | MIC at 4 $\mu\text{g/mL}$ of MER |
|-------|-------------------------------------------------------------------------------------|-------------|----------------------------------|----------------------------------|
| 11    | 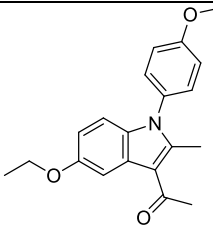   | 705249      | $\geq 128$                       | 16                               |
| 12    |    | 708055      | $\geq 128$                       | 64                               |
| 13    |    | 746058      | $\geq 256$                       | 8                                |
| 14    |   | 762508      | 64                               | 32                               |
| 15    |  | 781247      | $\geq 128$                       | 64                               |
| 16    |  | 804894      | 4                                | 8                                |
| 17    |  | 827826      | 16                               | 8                                |

| Entry | Structure                                                                           | PubChem CID | MIC at 0 $\mu\text{g/mL}$ of MER | MIC at 4 $\mu\text{g/mL}$ of MER |
|-------|-------------------------------------------------------------------------------------|-------------|----------------------------------|----------------------------------|
| 18    | 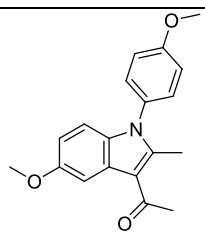   | 828023      | 64                               | $\geq 128$                       |
| 19    |    | 873088      | $\geq 128$                       | $\geq 128$                       |
| 20    |    | 878953      | $\geq 128$                       | $\geq 128$                       |
| 21    |   | 927090      | $\geq 128$                       | 64                               |
| 22    |  | 931244      | 64                               | 64                               |
| 23    |  | 940424      | $\geq 128$                       | 8                                |
| 24    |  | 947393      | $\geq 128$                       | $\geq 128$                       |

| Entry | Structure                                                                           | PubChem CID | MIC at 0 $\mu\text{g/mL}$ of MER | MIC at 4 $\mu\text{g/mL}$ of MER |
|-------|-------------------------------------------------------------------------------------|-------------|----------------------------------|----------------------------------|
| 25    | 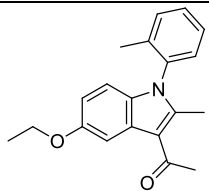   | 949476      | 8                                | 8                                |
| 26    |    | 949641      | $\geq 128$                       | $\geq 128$                       |
| 27    |    | 2055004     | 32                               | 16                               |
| 28    |   | 2329649     | 32                               | 8                                |
| 29    |  | 2778715     | 64                               | 64                               |
| 30    |  | 2882229     | 8                                | 8                                |
| 31    |  | 3237314     | 64                               | 64                               |
| 32    |  | 3694883     | 16                               | 8                                |

| Entry | Structure                                                                           | PubChem CID  | MIC at 0 $\mu\text{g/mL}$ of MER | MIC at 4 $\mu\text{g/mL}$ of MER |
|-------|-------------------------------------------------------------------------------------|--------------|----------------------------------|----------------------------------|
| 33    | 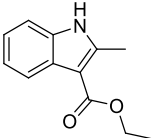   | 4072358      | 16                               | 16                               |
| 34    |    | 4777667      | $\geq 128$                       | 64                               |
| 35    |    | 5175771      | 32                               | 64                               |
| 36    |    | 10846825     | $\geq 128$                       | $\geq 128$                       |
| 37    |   | 12682603     | 64                               | 64                               |
| 38    |  | 14004102     | $\geq 128$                       | 64                               |
| 39    |  | 15157643     | 64                               | 64                               |
| 40    |  | HCl 18558847 | 64                               | 32                               |
| 41    |  | 21234080     | 16                               | 8                                |

| Entry | Structure                                                                           | PubChem CID | MIC at 0 $\mu\text{g/mL}$ of MER | MIC at 4 $\mu\text{g/mL}$ of MER |
|-------|-------------------------------------------------------------------------------------|-------------|----------------------------------|----------------------------------|
| 42    | 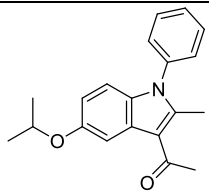   | 46891659    | 16                               | 16                               |
| 43    |    | 46891660    | $\geq 128$                       | 64                               |
| 44    |    | 49842879    | 16                               | 8                                |
| 45    |    | 49842880    | $\geq 128$                       | 64                               |
| 46    |  | 49842881    | 16                               | 16                               |
| 47    |  | 49842882    | 64                               | 32                               |
| 48    |  | 49842883    | 32                               | 2                                |
| 49    |  | 49867951    | $\geq 128$                       | 32                               |
| 50    |  | 49867952    | 32                               | 32                               |

| Entry | Structure                                                                           | PubChem CID | MIC at 0 $\mu\text{g/mL}$ of MER | MIC at 4 $\mu\text{g/mL}$ of MER |
|-------|-------------------------------------------------------------------------------------|-------------|----------------------------------|----------------------------------|
| 51    | 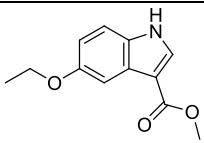   | 49867953    | $\geq 128$                       | $\geq 128$                       |
| 52    |    | 49867954    | 64                               | 64                               |
| 53    |    | 49867955    | $\geq 128$                       | $\geq 128$                       |
| 54    |    | 53308687    | $\geq 128$                       | $\geq 128$                       |
| 55    |  | 53308688    | 64                               | 32                               |
| 56    |  | 53308689    | $\geq 128$                       | 64                               |
| 57    |  | 53308690    | $\geq 128$                       | $\geq 128$                       |
| 58    |  | 53308691    | $\geq 128$                       | 64                               |

| Entry | Structure                                                                           | PubChem CID | MIC at 0 $\mu\text{g/mL}$ of MER | MIC at 4 $\mu\text{g/mL}$ of MER |
|-------|-------------------------------------------------------------------------------------|-------------|----------------------------------|----------------------------------|
| 59    | 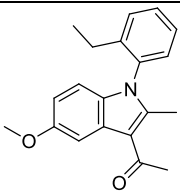   | 53308692    | 16                               | 8                                |
| 60    |    | 53308693    | 32                               | 16                               |
| 61    |    | 53308694    | $\geq 128$                       | 64                               |
| 62    |   | 53308695    | $\geq 128$                       | $\geq 128$                       |
| 63    |  | 53308696    | 8                                | 4                                |
| 64    |  | 53308697    | $\geq 128$                       | $\geq 128$                       |
| 65    |  | 53308698    | $\geq 128$                       | 64                               |



| Entry | Structure                                                                         | PubChem CID | MIC at 0 $\mu\text{g/mL}$ of MER | MIC at 4 $\mu\text{g/mL}$ of MER |
|-------|-----------------------------------------------------------------------------------|-------------|----------------------------------|----------------------------------|
| 66    | 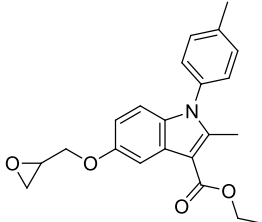 | 53308699    | 32                               | 32                               |
| 67    |  | 53308700    | 8                                | 4                                |
| 68    |  | 53308701    | $\geq 128$                       | $\geq 128$                       |
| 69    | Rifampin (RIF)                                                                    | 5381226     | 0.125                            | 0.125                            |
| 70    | Isoniazid (INH)                                                                   | 3767        | 0.02                             | 0.02                             |

**Table S2.** Synthetic lethality structure-activity relationship screening on 39 bezothiophene derivatives (MIC in  $\mu\text{g/mL}$  at 0, 2 and 4  $\mu\text{g/mL}$  of meropenem)

| Entry | Structure                                                                           | PubChem CID | MIC at 0 $\mu\text{g/mL}$ of MER | MIC at 2 $\mu\text{g/mL}$ of MER | MIC at 4 $\mu\text{g/mL}$ of MER |
|-------|-------------------------------------------------------------------------------------|-------------|----------------------------------|----------------------------------|----------------------------------|
| 1     | 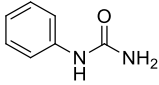   | 6145        | $\geq 128^*$                     | $\geq 128^*$                     | $\geq 128^*$                     |
| 2     |    | 283977      | 64                               | 64                               | 64                               |
| 3     |    | 853562      | $\geq 128^*$                     | $\geq 128^*$                     | $\geq 128^*$                     |
| 4     |    | 1302558     | 64                               | 64                               | 64                               |
| 5     |    | 2308931     | $\geq 128^*$                     | $\geq 128^*$                     | 64                               |
| 6     |    | 2731492     | $\geq 128^*$                     | $\geq 128^*$                     | $\geq 128^*$                     |
| 7     |   | 2813497     | 64                               | 2                                | 2                                |
| 8     |  | 3122100     | 64                               | 32                               | 16                               |
| 9     |  | 7616028     | 32                               | 64                               | 64                               |
| 10    |  | 13182769    | 8                                | 2                                | 1                                |
| 11    |  | 16810982    | 32                               | 32                               | 32                               |
| 12    |  | 60705040    | 64                               | 64                               | 64                               |
| 13    |  | 62686029    | 64                               | $\geq 128^*$                     | $\geq 128^*$                     |

| Entry | Structure                                                                           | PubChem CID | MIC at 0 $\mu\text{g/mL}$ of MER | MIC at 2 $\mu\text{g/mL}$ of MER | MIC at 4 $\mu\text{g/mL}$ of MER |
|-------|-------------------------------------------------------------------------------------|-------------|----------------------------------|----------------------------------|----------------------------------|
| 14    | 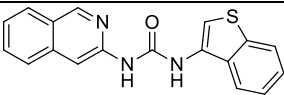   | 66545913    | $\geq 128^*$                     | $\geq 128^*$                     | $\geq 128^*$                     |
| 15    |    | 66545914    | 64                               | 64                               | 64                               |
| 16    |    | 66545915    | 2                                | 2                                | 2                                |
| 17    |    | 66545916    | 4                                | 2                                | 2                                |
| 18    |   | 66545917    | 64                               | 64                               | $\geq 128^*$                     |
| 19    |  | 66545918    | $\geq 128^*$                     | $\geq 128^*$                     | $\geq 128^*$                     |
| 20    |  | 66545919    | 32                               | 16                               | 16                               |
| 21    |  | 66545920    | $\geq 128^*$                     | $\geq 128^*$                     | $\geq 128^*$                     |
| 22    |  | 66545921    | 64                               | 16                               | 4                                |
| 23    |  | 66545922    | $\geq 128^*$                     | 64                               | 64                               |
| 24    |  | 66545923    | 32                               | 16                               | 16                               |

| Entry | Structure                                                                           | PubChem CID | MIC at 0 $\mu\text{g/mL}$ of MER | MIC at 2 $\mu\text{g/mL}$ of MER | MIC at 4 $\mu\text{g/mL}$ of MER |
|-------|-------------------------------------------------------------------------------------|-------------|----------------------------------|----------------------------------|----------------------------------|
| 25    | 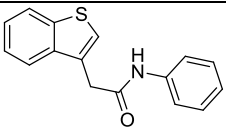   | 66545924    | 32                               | 32                               | 32                               |
| 26    |    | 66545925    | 16                               | 16                               | 16                               |
| 27    |    | 66545926    | $\geq 128^*$                     | $\geq 128^*$                     | 32                               |
| 28    |    | 66545927    | 64                               | 16                               | 8                                |
| 29    |    | 66545928    | 16                               | 4                                | 2                                |
| 30    |   | 66545929    | 2                                | 2                                | 1                                |
| 31    |  | 66545930    | $\geq 128^*$                     | $\geq 128^*$                     | $\geq 128^*$                     |
| 32    |  | 66545931    | 64                               | 32                               | 64                               |
| 33    |  | 66545932    | 16                               | 16                               | 16                               |
| 34    |  | 66545933    | 64                               | 64                               | 64                               |
| 35    |  | 66545934    | 2                                | 2                                | 2                                |
| 36    |  | 66545935    | $\geq 128^*$                     | $\geq 128^*$                     | $\geq 128^*$                     |

| Entry | Structure                                                                         | PubChem CID | MIC at 0 $\mu\text{g/mL}$ of MER | MIC at 2 $\mu\text{g/mL}$ of MER | MIC at 4 $\mu\text{g/mL}$ of MER |
|-------|-----------------------------------------------------------------------------------|-------------|----------------------------------|----------------------------------|----------------------------------|
| 37    | 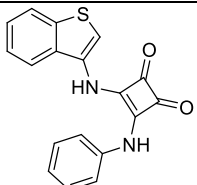 | 66545936    | 64                               | 16                               | 16                               |
| 38    |  | 66545937    | $\geq 128^*$                     | $\geq 128^*$                     | 64                               |
| 39    |  | 66545938    | 8                                | 8                                | 4                                |
